# Supplementary material for: Species richness and biogeographical affinities of the marine molluscs from Bahía de Chamela, Mexico
Source: Biodivers Data J. 2020 Dec 11;8:e59191. doi: 10.3897/BDJ.8.e59191 (PMC7749099; doi:10.3897/BDJ.8.e59191)
Supplement: Supplementary material 1 — Checklist of marine molluscs of Bahía Chamela with information on their local distribution and biogeographic affinities. [file bdj-08-e59191-s001.xlsx]

## Sheet: Hoja1
Suppl. material 1: Checklist of marine mollusks of Bahía Chamela with information on their local distribution and biogeographic affinities. Location and geographic position of the sampling sites in Table 1. Biogeographic classification based on the spatial units (Realms, Provinces, Ecoregions) proposed by Spalding et al. (2007). These are eight Realms and the Provinces where species have been rec…
Taxa	Distribution in Bahia Chamela	Geographic
		Realms(Provinces)
ORDER MYTILIDA
Mytilidae
Botula cylista S. S. Berry, 1959	29	RTEP(TEP)
Brachidontes adamsianus (Dunker, 1857)	14, 19,20, 30	RTNP(WTNP), RTEP(TEP)
Brachidontes semilaevis (Menke, 1848)	24, 30	RTNP (WTNP, COR), RTEP(TEP)
Choromytilus palliopunctatus (Carpenter, 1857)	14, 17, 26, 27	RTNP (WTNP, COR), RTEP(TEP)
Gregariella denticulata (Dall, 1871)	29	RTEP(TEP)
Leiosolenus aristatus (Dillwyn, 1817)	8, 12, 14, 17, 20, 24, 25, 28	RTNP(WTNP), RTEP(TEP), COS
Leiosolenus calyculatus (Carpenter, 1857)	28	RTEP(TEP)
Leiosolenus plumula (Hanley, 1843)	5, 14, 20, 27	RTNP(WTNP), RTEP(TEP)
Leiosolenus spatiosus Carpenter, 1857	11	RTEP(TEP)
Lioberus salvadoricus (Hertlein & Strong, 1946)	12, 24, 26, 27	RTEP(TEP)
Modiolus capax (Conrad, 1837)	11, 12, 14, 15, 17, 18, 19, 20, 22, 24, 26, 27, 28	RTNP(WTNP), RTEP(TEP)
Modiolus eiseni A. M. Strong & Hertlein, 1937	17, 27	RTEP(TEP)
Mytella guyanensis (Lamarck, 1819)	14,17, 27	RTNP (WTNP, COR), RTEP(TEP), RTA(NBS)
Septifer zeteki Hertlein & A. M. Strong, 1946	20, 21, 22	RTEP(TEP)
ORDER ARCIDA
Arcidae
Acar bailyi Bartsch, 1931	20	RTNP(WTNP), RTEP(TEP)
Acar gradata (Broderip & G. B. Sowerby I, 1829)	12, 14, 15, 24, 25, 27, 29	RTEP(TEP)
Anadara formosa (G. B. Sowerby I, 1833)	14, 26, 27	RTNP (WTNP, COR), RTEP(TEP)
Arca mutabilis (G. B. Sowerby I, 1833)	24, 31	RTEP(TEP)
Arca pacifica (G. B. Sowerby I, 1833)	20	RTEP(TEP)
Fugleria illota (G. B. Sowerby I, 1833)	24	RTEP(TEP, IGAL)
Larkinia multicostata (G. B. Sowerby I, 1833)	20	RTEP(TEP, IGAL, ILTM), RTNP(WTNP)
Glycymerididae
Glycymeris gigantea (Reeve, 1843)	6, 17	RTEP(TEP, MTP)
Tucetona multicostata (G. B. Sowerby I, 1833)	4, 11, 17, 27	RTEP(TEP)
Tucetona strigilata (G. B. Sowerby I, 1833)	4, 11	RTEP(TEP)
Philobryidae
Philobrya setosa (Carpenter, 1864)	24, 28	RTNP(WTNP), RTEP(TEP)
ORDER OSTREIDA
Pteriidae
Pinctada mazatlanica (Hanley, 1856)	7, 12, 14, 17, 20, 24, 26, 27, 28	RTEP(TEP)
Isognomonidae
Isognomon janus Carpenter, 1857	14, 31	RTNP(WTNP), RTEP(TEP)
Pinnidae
Atrina maura (G. B. Sowerby I, 1835)	14	RTEP(TEP)
Pinna rugosa G. B. Sowerby I, 1835	26	RTEP(TEP)
Ostreidae
Ostrea angelica (Rochebrune, 1895)	20, 28	RTEP(TEP)
Saccostrea palmula (Carpenter, 1857)	14	RTEP(TEP)
Striostrea prismatica (Gray, 1825)	17	RTEP(TEP)
ORDER PECTINIDA
Pectinidae
Nodipecten subnodosus (G. B. Sowerby I, 1835)	26	RTNP(WTNP), RTEP(TEP)
Plicatulidae
Plicatula anomioides Keen, 1958	26, 27	RTEP(TEP)
ORDER LIMIDA
Limidae
Limaria pacifica (d'Orbygny, 1846)	15, 21	RTEP(TEP)
ORDER LUCINIDA
Lucinidae
Codakia distinguenda (Tryon, 1872)	14, 24, 28, 31	RTEP(TEP)
Ctena chiquita (Dall, 1901)	4	RTEP(TEP)
Divalinga eburnea (Reeve, 1850)	27, 29, 31	RTEP(TEP)
Divalinga perparvula (Dall, 1901)	1	RTEP(TEP)
Liralucina approximata (Dall, 1901)	29	RTEP(TEP)
Parvilucina mazatlanica (Carpenter, 1857)	24, 27	RTEP(TEP)
ORDER CARDITIDA
Carditidae
Carditamera affinis (G. B. Sowerby I, 1833)	12, 14, 17, 24, 25, 26, 27, 28, 31	RTEP(TEP)
Cardites crassicostatus (G. B. Sowerby I, 1825)	14, 19, 20,24, 25, 27, 28	RTEP(TEP)
Cardites grayi (Dall, 1903)	14, 19, 20, 27	RTEP(TEP)
Cardites laticostatus (G. B. Sowerby I, 1833)	14, 20, 24	RTEP(TEP)
Crassatellidae
Crassinella adamsi Olsson, 1961	30	RTEP(TEP)
Crassinella ecuadoriana Olsson, 1961	4, 30	RTEP(TEP)
Crassinella pacifica (C. B. Adams, 1852)	4, 26	RTNP(WTNP), RTEP(TEP)
Crassinella skoglundae Coan, 1979	19, 27	RTEP(TEP)
ORDER CARDIIDA
Cardiidae
Americardia biangulata (Broderip & G. B. Sowerby I, 1829)	6	RTNP(WTNP), RTEP(TEP)
Americardia planicostata (Broderip & G. B. Sowerby I, 1833)	30	RTEP(TEP, ITLM), RTSA
Dallocardia senticosa (G. B. Sowerby I, 1833)	27	RTEP(TEP)
Laevicardium clarionense (Hertlein & A. M. Strong, 1947)	1, 4	RTEP(TEP)
Laevicardium substriatum (Conrad, 1837)	6, 19	RTNP(WTNP), RTEP(TEP)
Papyridea aspersa (G. B. Sowerby I, 1833)	14, 17, 26, 28	RTEP(TEP)
Trachycardium consors (G. B. Sowerby I, 1833)	1	RTEP(TEP)
Trachycardium procerum (G. B. Sowerby I, 1833)	1	RTEP(TEP)
Trigoniocardia granifera (Broderip & Sowerby, 1829)	1	RTNP(WTNP), RTEP(TEP)
Tellinidae
Eurytellina hiberna (Hanley, 1844)	27	RTEP(TEP)
Lyratellina lyrica (Pilsbry & H. N. Lowe, 1932)	30	RTEP(TEP)
Serratina brevirostris (Deshayes, 1855)	1	RTEP(TEP, IGAL)
Psammobiidae
Gari panamensis Olsson, 1961	17, 26	RTNP(COR), RTEP(TEP)
Semelidae
Cumingia lamellosa G. B. Sowerby I, 1833	18, 20	RTEP(TEP)
Semele bicolor (C. B. Adams, 1852)	14	RTEP(TEP)
Semele formosa (G. B. Sowerby I, 1833)	19, 27	RTEP(TEP)
Semele pilsbryi Olsson, 1961	17	RTEP(TEP)
Semele purpurascens (Gmelin, 1791)	14	RTNP (WTNP, COR), RTEP(TEP, IGAL), RTA(TNA, NBS, TSA), RTNP (WTNP)
Semele rosea (G. B. Sowerby I, 1833)	14	RTEP(TEP)
Solecurtidae
Tagelus longisinuatus Pilsbry & H. N. Lowe, 1932	10, 24	RTEP(TEP, MTP)
Tagelus politus (Carpenter, 1857)	24	RTEP(TEP)
ORDER GALEOMMATIDA
Galeommatidae
Cymatioa electilis (S. S. Berry, 1963)	14, 17, 26	RTEP(TEP, IGAL)
ORDER VENERIDA
Chamidae
Chama buddiana C. B. Adams, 1852	14, 17, 25	RTEP(TEP)
Chama coralloides Reeve, 1846	12, 14, 17, 23, 24, 25, 26, 28, 31	RTEP(TEP)
Pseudochama picta (Chenu, 1846)	12, 20	RTEP(TEP, IGAL)
Ungulinidae
Diplodonta caelata (Reeve, 1850)	12	RTEP(TEP, IGAL)
Zemysina subquadrata Carpenter, 1856	9, 10	RTEP(TEP, IGAL IREV), RTNP(WTNP)
Veneridae
Chione guatulcoensis Hertlein & A. M. Strong, 1948	4	RTEP(TEP)
Chione subimbricata (G. B. Sowerby I, 1835)	12, 14, 17, 19, 20, 23, 25, 25, 27, 28	RTEP(TEP)
Chione tumens Verrill, 1870 *	24, 27	RTEP(TEP) RTNP(WTNP, COR)
Chionopsis gnidia (Broderip & G. B. Sowerby I, 1829)	4	RTEP(TEP), RTNP(WTNP)
Chionopsis ornatissima (Broderip, 1835)	1, 4	RTEP(TEP)
Choristodon robustus (G. B. Sowerby I, 1834)	20	RTEP(TEP, IGAL)
Gouldia californica Dall, 1917	4, 11	RTEP(TEP, IGAL)
Hyphantosoma pollicaris (Carpenter, 1864)	26	RTEP(TEP), RTSA
Iliochione subrugosa (W. Wood, 1828)	14	RTEP(TEP)
Lamelliconcha concinna (G. B. Sowerby I, 1835)	27	RTEP(TEP)
Megapitaria aurantiaca (G. B. Sowerby I, 1831)	14, 17, 20, 24, 26, 28	RTNP(WTNP,COR), RTEP(TEP, IGAL)
Megapitaria squalida (G. B. Sowerby I, 1835)	7, 16, 20, 24, 27	RTEP(TEP)
Paphonotia elliptica (G. B. Sowerby I, 1834)	6, 12, 14, 17, 20, 25, 29	RTEP(TEP), RTSA
Periglypta multicostata (G. B. Sowerby I, 1835)	12, 17, 20, 26, 28	RTEP(TEP)
Pitar consanguineus (C. B. Adams, 1852)	1	RTEP(TEP)
Pitar berryi Keen, 1971	14	RTEP(TEP)
Pitar helenae Olsson, 1961	1	RTEP(TEP, IGAL)
Pitar omissa (Pilsbry & H. N. Lowe, 1932)	1	RTEP(TEP)
Tivela byronensis (Gray, 1838)	4, 6	RTEP(TEP)
Transennella modesta (Broderip & G. B. Sowerby, 1835)	4, 11, 20, 24	RTEP(TEP)
Transennella puella (Carpenter, 1864)	4, 5, 11, 20, 24, 26	RTNP(WTNP, COR), RTEP(TEP)
Neoleptonidae
Neolepton subtrigonum (Carpenter, 1857)	12, 14, 18, 20, 21, 25	RTEP(TEP, IGAL)
ORDER MYIDA
Myidae
Sphenia fragilis (H. Adams & A. Adams, 1854)	22, 29	RTEP(TEP)
Corbulidae
Caryocorbula marmorata (Hinds, 1843)	4, 11	RTEP(TEP)
Caryocorbula nasuta (G. B. Sowerby I, 1833)	7, 30	RTEP(TEP, IGAL)
Caryocorbula otra (Coan, 2002)	27	RTEP(TEP)
Caryocorbula ovulata (G. B. Sowerby I, 1833) *	30	RTEP(Costa Rica to Perú)
ORDER ADAPEDONTA
Hiatellidae
Hiatella arctica (Linnaeus, 1767)	12, 15, 20, 21, 27, 28	RTEP(TEP), COS (RAR)
ORDER GASTROCHAENIDA
Gastrochaenidae
Gastrochaena ovata G. B. Sowerby I, 1834	19, 20	RTNP (WTNP, COR), RTEP(TEP, IGAL, IREV, ICOC, ICLI), RTA(TNA)
ORDER PHOLADOMYIDA (ANOMALODESMATA)
Pandoridae
Pandora rachaelae Valentich-Scott & Skoglund, 2010	4	RTEP(TEP, IREV)
CLASS GASTROPODA
ORDER LEPETELLIDA
Fissurellidae
Diodora inaequalis (G. B. Sowerby I, 1835)	7, 15, 20	RTEP(TEP)
Fissurella gemmata Menke, 1847	15	RTEP(TEP, MTP)
Fissurella microtrema G. B. Sowerby, 1835	15, 19	RTEP(TEP)
Fissurella rubropicta Pilsbry, 1890	15	RTNP(WTNP), RTEP(TEP)
Fissurella virescens G. B. Sowerby, 1835	20, 30	RTEP(TEP)
Lucapinella elenorae McLean, 1967	5	RTEP(TEP)
Lucapinella milleri Berry, 1959	18	RTEP(TEP)
Patellidae
Scutellastra mexicana (Broderip & G. B. Sowerby I, 1829)	13, 24	RTEP(TEP)
Lottiidae
Lottia acutapex (S. S. Berry, 1960)	4	RTEP(TEP, IREV) RTNP(WTNP, COR)
Lottia discors (Philippi, 1849)	15	RTEP(TEP, ITLM, IREV)
Lottia fascicularis (Menke, 1851)	14, 15	RTEP(TEP)
Lottia mesoleuca (Menke, 1851)	15, 19	RTEP(TEP)
Lottia mitella (Menke, 1847)	15, 27	RTEP(TEP)
Lottia pediculus (Philippi, 1846)	15	RTEP(TEP)
Lottia stanfordiana (Berry, 1957) *	7	RTNP(WTNP, COR)
ORDER TROCHIDA
Tegulidae
Tegula corteziana McLean, 1970 *	7	RTNP(WTNP, COR)
Tegula globulus (Carpenter, 1857)	24	RTEP(TEP) (ILTM)
Tegula ligulata (Menke, 1850)	4	RTEP(TEP) (ILTM)
Tegula rubroflammulata (Koch in Philippi, 1843)	24	RTEP(TEP)
Tegula verdispira McLean, 1970 *	9, 30	RTNP(WTNP, COR), RTEP(ILTM)
Areneidae
Arene balboai (A. M. Strong & Hertlein, 1939)	4, 11	RTEP(TEP)
Arene fricki (Crosse, 1865)	4, 15, 17, 30	RTEP(TEP)
Turbinidae
Uvanilla unguis (W. Wood, 1828)	14	RTEP(TEP, ILTM)
Phasianellidae
Eulithidium phasianella (Philippi, 1849)	4	RTEP(TEP, IREV)
ORDER CYCLONERITIDA
Neritidae
Nerita funiculata Menke, 1850	15	RTEP(TEP, IGAL, ICOC)
Nerita scabricosta Lamarck, 1822	20	RTEP(TEP, ILTM, IGAL, ICOC), RTNP(WTNP)
ORDER LITTORINIMORPHA
Littorinidae
Echinolittorina aspera (Philippi, 1846)	15, 30	RTEP(TEP)
Echinolittorina modesta (Philippi, 1846)	20	RTEP(TEP)
Littoraria pintado pullata (Carpenter, 1864)	9, 30	RTEP(TEP, ILTM, IREV, ICOC), RTNP(WTNP)
Rissoinidae
Rissoina stricta (Menke, 1850)	7, 15, 30	RTEP(TEP)
Caecidae
Caecum heptagonum Carpenter, 1857	29	RTEP(TEP)
Vermetidae
Petaloconchus macrophragma Carperter, 1857	17, 24, 26	RTEP(TEP)
Thylacodes margaritaceus (Rosseau in Chenu, 1844)	15, 27	RTEP(TEP)
Hipponicidae
Cheilea corrugata (Broderip, 1834)	27	RTEP(TEP)
Hipponix panamensis C. B. Adams, 1852	24	RTEP(TEP)
Hipponix planatus Carpenter, 1857	15	RTEP(TEP)
Pilosabia trigona (Gmelin, 1791)	20, 21, 22	RTEP(TEP)
Calyptraeidae
Bostrycapulus aculeatus (Gmelin, 1791)	7, 12, 15, 18, 20, 21, 22, 27	RTNA (WTNA, MS), RTEP(TEP, IGAL), RTA(TNA, NBS, TSA), RTSA(WTSA), RTSAF(AG), REIP(HA), RTNP(WTNP), PAN
Calyptraea conica Broderip, 1834	23, 25	RTEP(TEP)
Calyptraea lichen Broderip, 1834	20	RTEP(TEP)
Calyptraea mamillaris Broderip, 1834	30	RTEP(TEP)
Calyptraea subreflexa (Carpenter, 1856)	24	RTEP(TEP, MTP)
Crepidula arenata (Broderip, 1834)	1	RTEP(TEP)
Crepidula excavata (Broderip, 1834)	7, 15	RTEP(TEP)
Crepidula incurva (Broderip, 1834)	7, 12	RTEP(TEP)
Crepidula lessonii (Broderip, 1834)	15	RTEP(TEP)
Crepidula onyx G. B. Sowerby I, 1824	15, 21, 22	RTEP(TEP)
Crepidula striolata Menke, 1851	13	RTEP(TEP)
Crepipatella dorsata (Broderip, 1834)	15	RTNP(WTNP), RTEP(TEP)
Crucibulum cyclopium Berry, 1969	27	RTEP(TEP)
Crucibulum monticulus Berry, 1969	20	RTEP(TEP, MTP)
Crucibulum pectinatum Carpenter, 1856	1	RTEP(TEP)
Crucibulum scutellatum (W. Wood, 1828)	4, 14, 18, 20	RTEP(TEP)
Crucibulum spinosum (G. B. Sowerby I, 1824)	4, 6, 7, 12, 13, 15, 18, 20, 21, 22	RTEP(TEP)
Crucibulum umbrella (Deshayes, 1830)	20	RTEP(TEP)
Capulidae
Thyca callista Berry, 1959	12	RTEP(TEP), RTNP(COR)
Naticidae
Eunaticina heimi Jordan & Hertlein, 1934	28	RTEP(TEP)
Triviidae
Niveria pacifica (Sowerby, 1832)	14, 17	RTEP(TEP)
Pseudopusula californiana (Gray, 1827)	12
Pseudopusula sanguinea (Sowerby, 1832)	16, 18, 28	RTEP(TEP)
Pusula radians (Lamarck, 1810)	16, 24	RTEP(TEP)
Cypraeidae
Macrocypraea cervinetta (Kiener, 1844)	15	RTEP(TEP, IGAL, ICOC), RTSA
Naria albuginosa (J. E. Gray, 1825)	7	RTEP(TEP) (ILTM, IGAL, ICOC, IREV, ICLI)
Pseudozonaria arabicula (Lamarck, 1810)	12, 15, 24, 4, 14, 20, 23, 24, 25, 26, 27, 28	RTEP(TEP, IGAL, ILTM), RTNP(WTNP)
Pseudozonaria annettae (Dall, 1909)	15	RTEP(TEP)
Ovulidae
Jenneria pustulata (Lightfoot, 1786)	6, 24, 28	RTEP(TEP, ILTM)
Simnia avena (G. B. Sowerby I, 1833)	13	RTEP(TEP, ICOC), RTSA
Simnialena rufa (G. B. Sowerby I, 1833)	27	RTEP(TEP)
Tonnidae
Malea ringens (Swainson, 1822)	12	RTEP(TEP)
Cassidae
Cypraecassis coarctata (G. B. Sowerby I, 1825)	24	RTEP(TEP, IGAL, COR, ILTM)
Cymatiidae
Monoplex amictus (Reeve, 1844)	12	RTEP(TEP, IGAL, ICOC, IREV), RTNP(WTNP), RCIP (WCT)
Monoplex vestitus (Hinds, 1844)	14	RTEP(TEP, IGAL, ILTM, ICOC)
Bursidae
Bursa corrugata (Perry, 1811)	27	RTEP(TEP)
ORDER CAENOGASTROPODA (temporary name)
Turritellidae
Turritella nodulosa P. P. King, 1832	28	RTEP(TEP)
Vermicularia frisbeyae McLean, 1970	9, 22, 24	RTEP(TEP)
Vermicularia pellucida eburnea (Reeve, 1842)	24	RTEP(TEP)
Cerithiidae
Alabina effusa (Carpenter, 1857)	7	RTEP(TEP)
Cerithium adustum Kiener, 1841	27	RTEP(TEP, IGAL, ICOC)
Cerithium atromarginatum Dautzenberg & Bouge, 1933	7	PAN
Cerithium gemmatum Hinds, 1844	25	RTEP(TEP, ITLM)
Cerithium maculosum Kiener, 1841	4, 14, 20, 27	RTEP(TEP, MTP)
Cerithium menkei Carpenter, 1857	30	RTEP(TEP)
Cerithiopsidae
Cerithiopsis halia Bartsch, 1911	30	RTEP(TEP)
Seila assimilata (C. B. Adams, 1852)	7, 27	RTEP(TEP)
Triphoridae
Triphora hannai F. Baker, 1926	13	RTEP(TEP, IGAL)
Potamididae
Cerithideopsis californica (Haldeman, 1840)	31	RTEP(TEP)
Strombidae
Lobatus galeatus (Swainson, 1823)	12	RTEP(TEP)
Epitoniidae
Epitonium huffmani DuShane & McLean, 1968	20	RTEP(TEP)
ORDER NEOGASTROPODA
Muricidae
Acanthais triangularis (Blainville, 1832)	17	RTEP(TEP)
Aspella pyramidalis (Broderip, 1833)	8	RTEP(TEP)
Coralliophila monodonta (Blainville, 1832)	12	RTEP(TEP)
Dermomurex obeliscus (A. Adams, 1853)	24	RTEP(TEP)
Favartia incisa (Broderip, 1833)	26	RTEP(TEP)
Favartia lappa (Broderip, 1833)	27	RTEP(TEP)
Hexaplex ambiguus (Reeve, 1845)	27	RTEP(TEP)
Hexaplex erythrostomus (Swainson, 1831)	27	RTEP(TEP)
Hexaplex nigritus (Philippi, 1845)	27	RTEP(TEP)
Hexaplex princeps (Broderip, 1833)	17	RTEP(TEP)
Hexaplex regius (Swainson, 1821)	23, 30	RTEP(TEP)
Maxwellia angermeyerae (Emerson & D'Attilio, 1965)	17	RTEP(TEP)
Muricopsis zeteki Hertlein & A. M. Strong, 1951	15	RTEP(TEP, IGAL)
Neorapana muricata (Broderip, 1832)	20	RTEP(TEP, IGAL, ICOC), RTSA
Plicopurpura columellaris (Lamarck, 1816)	13, 15, 30	RTEP(TEP, IGAL, ICOC), RTSA
Stramonita biserialis (Blainville, 1832)	7, 30	RTEP(TEP)
Trachypollia lugubris (C. B. Adams, 1852)	13	RTEP(TEP)
Vasula speciosa (Valenciennes, 1832)	7, 1, 22	RTEP(TEP)
Vitularia salebrosa (King, 1832)	23	RTNP(WTNP), RTEP(TEP)
Pisaniidae
Bailya anomala (Hinds, 1844)	12	RTEP(TEP)
Cantharus berryi McLean, 1970	27	RTEP(TEP)
Engina fusiformis Pease, 1865	13	RTEP(TEP)
Engina maura (G. B. Sowerby, 1832)	13	RTEP(TEP)
Engina tabogaensis Bartsch, 1931	26	RTEP(TEP)
Gemophos sanguinolentus (Duclos, 1833)	7, 20	RTEP(TEP)
Hesperisternia elegans (Dall, 1908)	15, 25	RTEP(TEP)
Hesperisternia vibex (Broderip, 1833)	27	RTEP(TEP)
Monostiolum crebristriatus (Carpenter, 1856)	26	RTEP(TEP)
Columbellidae
Anachis adelinae (Tryon, 1883) *	7, 15	RTEP(TEP), RTNP(WTNP, COR)
Anachis scalarina (G. B. Sowerby I, 1832)	11	RTEP(TEP)
Anachis varia (G. B. Sowerby I, 1832)	16	RTEP(TEP)
Columbella fuscata G. B. Sowerby I, 1832	7, 20	RTEP(TEP)
Columbella haemastoma G. B. Sowerby I, 1832	12	RTEP(TEP)
Columbella major G. B. Sowerby I, 1832	27	RTEP(TEP)
Columbella sonsonatensis (Mörch, 1860)	20	RTEP(TEP)
Cosmioconcha palmeri (Dall, 1913)	7	RTEP(TEP)
Cosmioconcha parvula (Dall, 1913)	20	RTEP(TEP)
Glyptanachis hilli (Pilsbry & H. N. Lowe, 1932)	17	RTEP(TEP)
Ithiaesopus arestus (Dall, 1919)	17	RTEP(TEP)
Mazatlania fulgurata (Philippi, 1846)	1, 2, 3	RTEP(TEP)
Mitrella baccata (Gaskoin, 1852)	21	RTEP(TEP)
Mitrella guttata (G. B. Sowerby I, 1832)	15	RTEP(TEP)
Mitrella xenia (Dall, 1919)	30	RTEP(TEP)
Nassarina pammicra Pilsbry & H. N. Lowe, 1932	27	RTEP(TEP)
Nassarina vespera Keen, 1971	28	RTEP(TEP)
Parvanachis pygmaea (G. B. Sowerby I, 1832)	21	RTEP(TEP)
Steironepion piperatum (E. A. Smith, 1882)	17	RTEP(TEP)
Nassariidae
Nassarius gallegosi A. M. Strong & Hertlein, 1937	4,7,15	RTEP(TEP, ILTM)
Phrontis versicolor (C. B. Adams, 1852)	4	RTEP(TEP. IGAL)
Fasciolariidae
Leucozonia cerata (W. Wood, 1828)	15,30	RTEP(TEP)
Opeatostoma pseudodon (Burrow, 1815)	30,31	RTEP(TEP)
Pustulatirus mediamericanus (Hertlein & A. M. Strong, 1951)	13,24	RTEP(TEP)
Harpidae
Harpa crenata Swainson, 1822	26	RTEP(TEP, ILTM, ICOC)
Morum tuberculosum (Reeve, 1842)	24	RTEP(TEP)
Turbinellidae
Vasum caestus (Broderip, 1833)	27	RTEP(TEP)
Olividae
Vullietoliva splendidula (G. B. Sowerby I, 1825)	24	RTEP(TEP, ILTM)
Olivellidae
Olivella anazora (Duclos, 1835)	1, 2, 3, 4	RTEP(TEP, IGAL, ILTM)
Olivella gracilis (Broderip & G. B. Sowerby I, 1829)	1, 4, 11	RTEP(TEP, IGAL, ILTM)
Olivella sphoni J.Q. Burch & G. B. Campbell, 1963	24	RTEP(TEP)
Olivella tergina (Duclos, 1835)	4	RTEP(TEP)
Marginellidae
Granulina margaritula (Carpenter, 1857)	17	RTEP(TEP, IGAL), RTNP(WTNP)
Cystiscidae
Persicula phrygia (Sowerby II, 1846)	7,9	RTEP(TEP)
Plesiocystiscus politulus (Dall, 1919)	9, 17	RTEP(TEP), RTNP(WTNP)
Mitridae
Neotiara lens (W. Wood, 1828)	24, 30	RTEP(TEP, IGAL, ICOC)
Strigatella tristis (Broderip, 1836)	15	RTEP(TEP, IGAL, ILTM, ICOC)
Conidae
Conus brunneus W. Wood, 1828	12, 30	RTEP(TEP, IGAL, ILT, ICOC)
Conus nux Broderip, 1833	15,22,30	RTEP(TEP)
Conus princeps Linnaeus, 1758	22, 30	RTEP(TEP)
Conus purpurascens G. B. Sowerby I, 1833	12, 30	RTEP(TEP)
Terebridae
Terebra dislocata (Say, 1822)	17	RTEP(TEP)
Terebra ornata Gray, 1834	7	RTEP(TEP, IGAL, ILTM, ICOC)
Pseudomelatomidae
Crassispira discors (Sowerby I, 1834)	12	RTEP(TEP)
Pilsbryspira garciacubasi Shaski, 1971	23	RTEP(TEP, MTP)
Drilliidae
Brephodrillia ella Pilsbry & H. N. Lowe, 1932	15	RTEP(TEP)
Mangeliidae
Pyrgocythara danae (Dall, 1919) 1	14	RTEP(TEP), RTNP(WTNP, COR)
Raphitomidae
Microdaphne trichodes (Dall, 1919)	9	RTEP(TEP)
ORDER CEPHALASPIDEA 2,3
Bullidae
Bulla gouldiana Pilsbry, 1895	7	RTEP(TEP, IGAL), RTNP(WTNP)
Haminoeidae
Haminoea vesicula (Gould, 1955) *	14	RTEP(TEP), RTNP(WTNP, COR)
Tornatinidae
Acteocina infrequens (C. B. Adams, 1852)	7	RTEP(TEP), RTNP(WTNP)
ORDER APLYSIIDA
Aplysiidae
Aplysia californica J. G. Cooper, 1863	10, 21	RTEP(TEP), RTNP(WTNP)
ORDER PLEUROBRANCHIDA 2,3
Pleurobranchaeidae
Berthella californica (Dall, 1900) 4	20, 23	RTNP (WTNP, COR), RTEP(TEP, IGAL, ICOC)
Berthellina ilisima Ev. Marcus & Marcus, 1967 4	15	RTNP(WTNP, COR), RTEP(TEP, IGAL)
Pleurobranchus digueti Rochebrune, 1895 5	20	RTNP (WTNP, COR), RTEP(TEP, IGAL)
ORDER UMBRACULIDA 2,3
Tylodinidae
Tylodina fungina Gabb, 1865	21	RTNP(WTNP), RTEP(TEP)
ORDER SACOGLOSSA
Plakobranchidae
Elysia diomedea (Bergh, 1894)	6	RTEP(TEP)
ORDER NUDIBRANCHIA 2,3
Dorididae
Conualevia alba Collier & Farmer, 1964	11	RTEP(TEP), RTNP(WTNP)
Doris pickensi Marcus & Marcus, 1967	20	RTEP(TEP), RTNP(WTNP, COR)
Chromodorididae
Doriprismatica sedna (Ev. Marcus & Er. Marcus, 1967)	20	RTNP (COR), RTEP(TEP), RTA(TNA)
Felimare agassizii (Bergh, 1894)	15	RTEP(TEP, IGAL)
Felimida dalli (Bergh, 1879)	15	RTEP(TEP)
Felimida sphoni Ev. Marcus, 1971	15	RTEP(TEP)
Dendrodorididae
Doriopsilla janaina Er. Marcus & Ev. Marcus, 1967	15	RTEP(TEP)
Polyceridae
Tambja abdere Farmer, 1978	12	RTEP(TEP, RTNP(WTNP, COR)
Facelinidae
Phidiana lascrucensis Bertsch & Ferreira, 1974	15	RTEP(TEP)
ORDER SYSTELLOMMATOPHORA
Onchidiidae
Hoffmannola hansi Ev. Marcus & Er. Marcus, 1967 6	29	RTEP(TEP)
ORDER SIPHONARIIDA
Siphonariidae
Siphonaria maura G. B. Sowerby I, 1835	18	RTEP(TEP)
Trimusculidae
Trimusculus reticulatus (G. B. Sowerby I, 1835)	14	RTEP(TEP)
CLASS POLYPLACOPHORA
ORDER CHITONIDA
Chaetopleuridae
Chaetopleura hanselmani (Ferreira, 1982)	7, 12, 13, 19, 25, 29	RTEP(TEP), RTSA
Chaetopleura lurida (G. B. Sowerby, 1832)	7, 18	RTEP(TEP), RTSA
Ischnochitonidae
Ischnochiton muscarius (Reeve, 1847)	7, 9, 12, 15, 17, 25, 29, 31	RTEP(TEP)
Stenoplax limaciformis (G. B. Sowerby I, 1832)	4, 7, 8, 12, 13, 14, 15, 17, 18, 19, 20, 21, 24, 27, 28	RTNP (COR), RTEP(TEP, ILTM)
Stenoplax sp. (undiscribed Reyes-Gómez)	12, 21, 27, 29, 31	**
Chitonidae
Chiton albolineatus Broderip & G.B. Sowerby I, 1829	7	RTEP(TEP), RTNP(WTNP)
Chiton articulatus G. B. Sowerby I, 1832	15, 27	RTEP(TEP, IREV)
Tonicia forbesii Carpenter, 1857	8, 28, 31	RTEP(TEP)
Acanthochitonidae
Acanthochitona arragonites (Carpenter, 1857)	14, 20, 29, 31	RTEP(TEP, IGAL, ILTM)
Callistoplacidae
Callistoplax retusa (G. B. Sowerby I, 1832)	7, 15, 18, 25	RTEP(TEP)
Callistochiton sp. (undiscribed Reyes-Gómez)	7, 12, 14, 18, 21, 24, 25, 28	**
Lepidochitonidae (sinonmized as Tonicellidae)
Lepidochitona salvadorensis García-Ríos, 2006	13, 18, 19, 29, 31	RTEP(TEP)
Lepidochitona sp. (undiscribed Reyes-Gómez)	25, 29, 31	**
CLASS SCAPHOPODA
ORDER DENTALIIDA
Dentaliidae
Dentalium sp.	24	**
Graptacme semistriata (W. Turton, 1819)	4, 24	RTNP (WTNP, COR), RTEP(TEP), RTA(TNA,NBS)
CLASS CEPHALOPODA
ORDER OCTOPODA
Octopodidae
Octopus bimaculatus Verrill, 1883	1	RTEP(TEP), RTNP(WTNP, COR) 7
Octopus hubbsorum Berry, 1953	12, 14, 19, 25, 27	RTNP(WTNP, COR), RTEP(TEP, IREV) 7
1Smithsonian National Museum of Natural History (NMNH). Department of Invertebrate Zoology Collections at: https://collections.nmnh.si.edu/search/iz/?qn=Pyrgocythara+danae
2Gosliner T.M. (1996). The Opisthobranchia. In: Taxonomic Atlas of the Benthic Fauna of the Santa Maria Basin and Western Santa Barbara Channel. The Mollusca Part 2 – The Gastropoda. Santa Barbara Museum of Natural History. volume 9: 161-213.
3Marcus Ev.; Marcus Er. (1967). American opisthobranch mollusks Part I, Tropical American opisthobranchs, Part II, Opisthobranchs from the Gulf of California. Studies in Tropical Oceanography. 6: 1–256, pl. 1. page(s): 160, fig. 18
4Hessam Ghanimi, Jeffrey H R Goddard, Anton Chichvarkhin, Terrence M Gosliner, Dae-Wui Jung, Ángel Valdés, An integrative approach to the systematics of the Berthella californica species complex (Heterobranchia: Pleurobranchidae), Journal of Molluscan Studies, Volume 86, Issue 3, August 2020, Pages 186–200.
5Dall W.H. (1900). A new species of Pleurobranchus from California. The Nautilus. 14: 92-93.
6 Dayrat, B. (2009). Review of the current knowledge of the systematics of Onchidiidae (Mollusca: Gastropoda: Pulmonata) with a checklist of nominal species. Zootaxa. 2068: 1-26.
7Norman M.D., Finn J.K. & Hochberg F.G. (2014). Family Octopodidae. pp. 36-215, in P. Jereb, C.F.E. Roper, M.D. Norman & J.K. Finn eds. Cephalopods of the world. An annotated and illustrated catalogue of cephalopod species known to date. Volume 3. Octopods and Vampire Squids. FAO Species Catalogue for Fishery Purposes. Rome, FAO: 4(3): 353.
